# Supplementary material for: Projected impacts of climate change and ocean acidification on the global biogeography of planktonic Foraminifera
Source: Copernicus journal article supplement (doi:10.5194/bg-12-2873-2015), 2015-05-19
Supplement: Supplementary file 1 [file bg-12-2873-2015-supplement.zip]

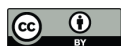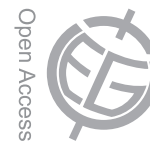

## *Supplement of*

# **Projected impacts of climate change and ocean acidification on the global biogeography of planktonic Foraminifera**

**T. Roy et al.**

*Correspondence to:* T. Roy (tirlod@locean-ipsl.upmc.fr)

- bg-12-2873-2015-supplement-cover-letter.pdf
- Sf01\_temp\_depend\_modified.png
- Sf02a\_sediment\_data.eps
- Sf02b\_plot\_omegaC\_glodap\_multinet.eps
- Sf03a\_plot\_surface\_model\_data\_PAPER.eps
- Sf03b\_dominant\_foram\_surface.eps

The copyright of individual parts of the supplement might differ from the CC-BY 3.0 licence.
